# Supplementary material
Source: PubMed Central journal article supplement (PMC2875984)
Supplement: fdp093_1.pdf [file fdp093_1.pdf]

Table S1. Factor Loadings for Twelve Items Assessing Interpersonal Social Support in the National Epidemiological Survey on Alcohol and Related Conditions (N=34,653)

| Perceived Interpersonal Social Support                                                                                                                         | Loading |
|----------------------------------------------------------------------------------------------------------------------------------------------------------------|---------|
| If I wanted to go on a trip for a day, I would find it hard to find someone to go with me                                                                      | 0.53    |
| I feel that there is no one I can share my most private worries and fears with                                                                                 | 0.54    |
| If I were sick, I know I would find someone to help me with my daily chores                                                                                    | 0.51    |
| There is someone I can turn to for advice about handling problems with my family                                                                               | 0.62    |
| If I decide one afternoon that I would like to go to a movie that evening, I could easily find someone to go with me                                           | 0.60    |
| When I need suggestions on how to deal with a personal problem, I know someone I can turn to                                                                   | 0.66    |
| I don't often get invited to do things with others                                                                                                             | 0.51    |
| If I had to go out of town for a few weeks, it would be difficult to find someone who would look after my house or apartment (the plants, pets, garden, etc.). | 0.44    |
| If I wanted to have lunch with someone, I could easily find someone to join me                                                                                 | 0.59    |
| If I was stranded 10 miles from home, there is someone I could call who would come and get me                                                                  | 0.54    |
| If a family crisis arose, it would be difficult to find someone who could give me good advice about how to handle it                                           | 0.49    |
| If I needed some help in moving to a new house or apartment, I would have a hard time finding someone to help me                                               | 0.51    |
